# Supplementary material
Source: publisher site journal article supplement (https://www.dovepress.com/article/552844)
Supplement: Supplementary file 1 [file 552844%20Supplementary%20Table%20S1.docx]

Supplementary Table S1 Baseline characteristics according to survival status

| Characteristics | Total (n = 267) | Survival (n = 145) | Non-survival (n = 122) | P value |
| --- | --- | --- | --- | --- |
| Age, years | 65.9 ± 13.8 | 63.1 ± 14.8 | 69.2 ± 11.7 | < 0.001 |
| Sex, male, n (%) | 181 (67.8) | 98 (67.6) | 83 (68) | 0.938 |
| CRKP, n (%) | 86 (32.2) | 27 (18.6) | 59 (48.4) | < 0.001 |
| Diabetes, n (%) | 118 (44.2) | 66 (45.5) | 52 (42.6) | 0.635 |
| Chronic heart failure, n (%) | 39 (14.6) | 15 (10.3) | 24 (19.7) | 0.032 |
| Chronic liver disease, n (%) | 26 ( 9.7) | 13 (9) | 13 (10.7) | 0.643 |
| Chronic kidney disease, n (%) | 39 (14.6) | 16 (11) | 23 (18.9) | 0.072 |
| Hematological disease, n (%) | 30 (11.2) | 17 (11.7) | 13 (10.7) | 0.783 |
| Malignant tumor, n (%) | 48 (18.0) | 30 (20.7) | 18 (14.8) | 0.208 |
| CVC, n (%) | 119 (44.6) | 50 (34.5) | 69 (56.6) | < 0.001 |
| Admitted to  ICU, n (%) | 160 (59.9) | 55 (37.9) | 105 (86.1) | < 0.001 |
| Ventilator use, n (%) | 138 (51.7) | 43 (29.7) | 95 (77.9) | < 0.001 |
| CRRT, n (%) | 47 (17.6) | 13 (9) | 34 (27.9) | < 0.001 |
| Nosocomial infection, n (%) | 112 (41.9) | 49 (33.8) | 63 (51.6) | 0.003 |
| Septic shock, n (%) | 133 (49.8) | 37 (25.5) | 96 (78.7) | < 0.001 |
| Pneumonia, n (%) | 140 (52.4) | 65 (44.8) | 75 (61.5) | 0.007 |
| Urinary tract infection, n(%) | 58 (21.7) | 38 (26.2) | 20 (16.4) | 0.053 |
| Intra-abodominal infection, n (%) | 27 (10.1) | 9 (6.2) | 18 (14.8) | 0.021 |
| Soft tissue infection, n (%) | 23 ( 8.6) | 12 (8.3) | 11 (9) | 0.83 |
| RDW, fL | 47.6 ± 12.2 | 44.4 ± 11.7 | 51.4 ± 11.8 | < 0.001 |
| WBC, 109/L | 10.1 (6.1, 15.3) | 8.9 (6.0, 13.8) | 11.0 (6.1, 18.9) | 0.042 |
| Hematocrit | 0.3 ± 0.1 | 0.3 ± 0.1 | 0.3 ± 0.1 | < 0.001 |
| Platelet, 109/L | 132.0 (51.0, 210.5) | 141.0 (71.0, 223.0) | 101.5 (41.0, 195.5) | 0.032 |
| CRP, mg/L | 162.4 ± 81.8 | 146.5 ± 81.5 | 181.4 ± 78.5 | < 0.001 |
| Procalcitonin, ng/mL | 9.8 (3.2, 25.8) | 5.5 (1.3, 15.6) | 16.6 (6.5, 35.6) | < 0.001 |
| Albumin, g/L | 29.9 ± 12.2 | 31.8 ± 5.3 | 27.6 ± 16.8 | 0.004 |
| Creatinine, umol/L | 95.0 (61.2, 193.2) | 81.0 (59.5, 127.2) | 158.0 (84.0, 266.0) | < 0.001 |
| SOFA score | 7.3 ± 4.4 | 3.9 ± 2.6 | 10.5 ± 3.1 | < 0.001 |
| Length of stay, days | 19.0 (10.0, 34.0) | 21.0 (11.0, 37.0) | 16.5 (7.0, 31.0) | 0.012 |
